# Supplementary material for: Hypoxia-inducible factor-2 alpha up-regulates CD70 under hypoxia and enhances anchorage-independent growth and aggressiveness in cancer cells
Source: PubMed Central journal article supplement (PMC5922382; doi:10.18632/oncotarget.24919), 2018-04-10
Supplement: oncotarget-09-19123-s001.pdf [file oncotarget-09-19123-s001.pdf]

## Hypoxia-inducible factor-2 alpha up-regulates CD70 under hypoxia and enhances anchorage-independent growth and aggressiveness in cancer cells

### SUPPLEMENTARY MATERIALS

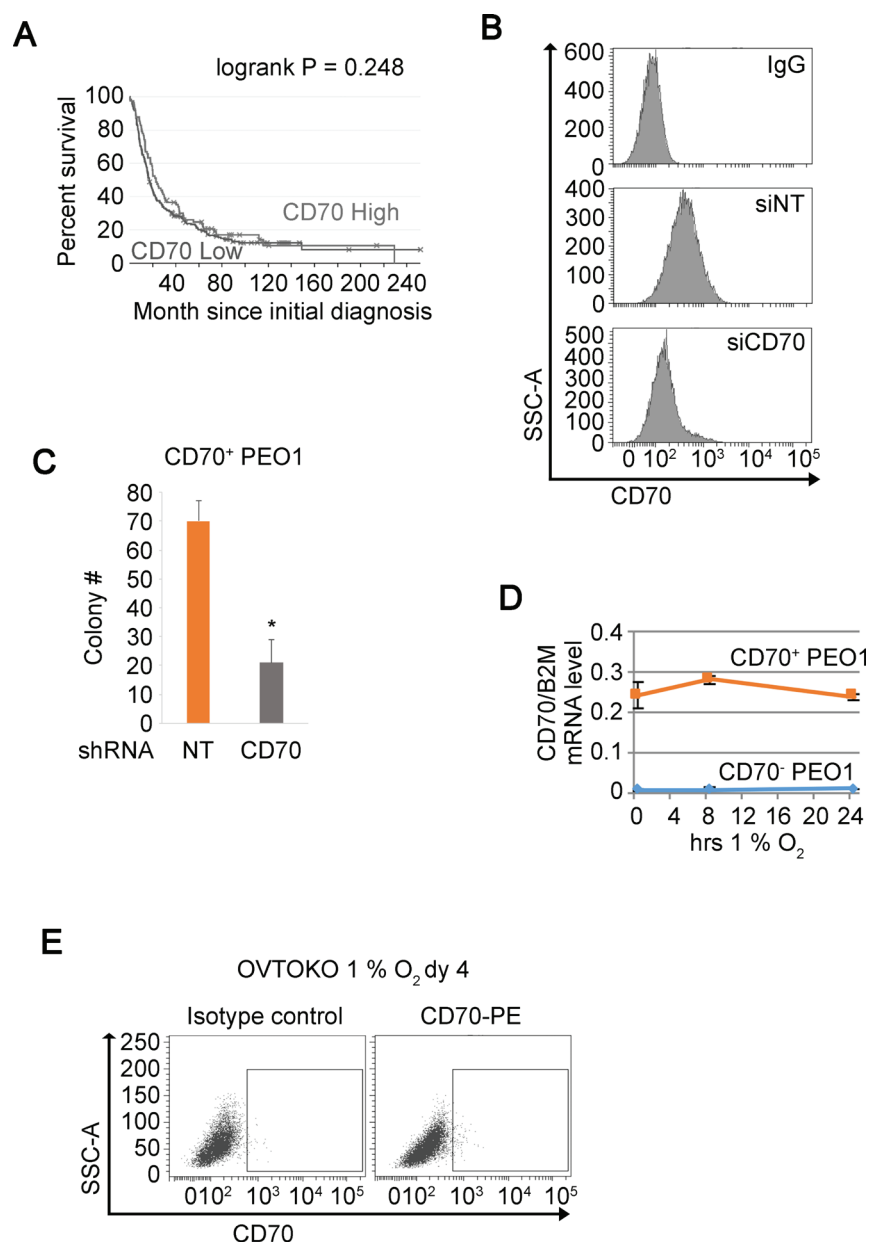

**Supplementary Figure 1:** (A) Kaplan–Meier plot of high and low CD70-expressing glioma patients. Overall survival is shown. (B) The CD70 expressions in CD70<sup>+</sup> PEO1 transfected with siRNA-CD70 (siCD70) or non-targeting control siRNA (siNT) were analyzed by flow cytometry (C) Changes in colony number in soft agar by a stable CD70 knockdown using shRNA. NT, non-targeting control. (D) CD70 mRNA levels normalized to B2M housekeeping reference gene under hypoxia were analyzed by qRT-PCR in CD70<sup>+</sup>/CD70<sup>-</sup> PEO1 cells in the indicated time course. (E) OVTOKO cells were cultured under 1% O<sub>2</sub> conditions for 4 days and stained with CD70 antibody or isotype control. Plots show CD70 expressions detected by flow cytometry. Error bars indicate s.e.m. \* $P < 0.05$  (Student's *t*-test).

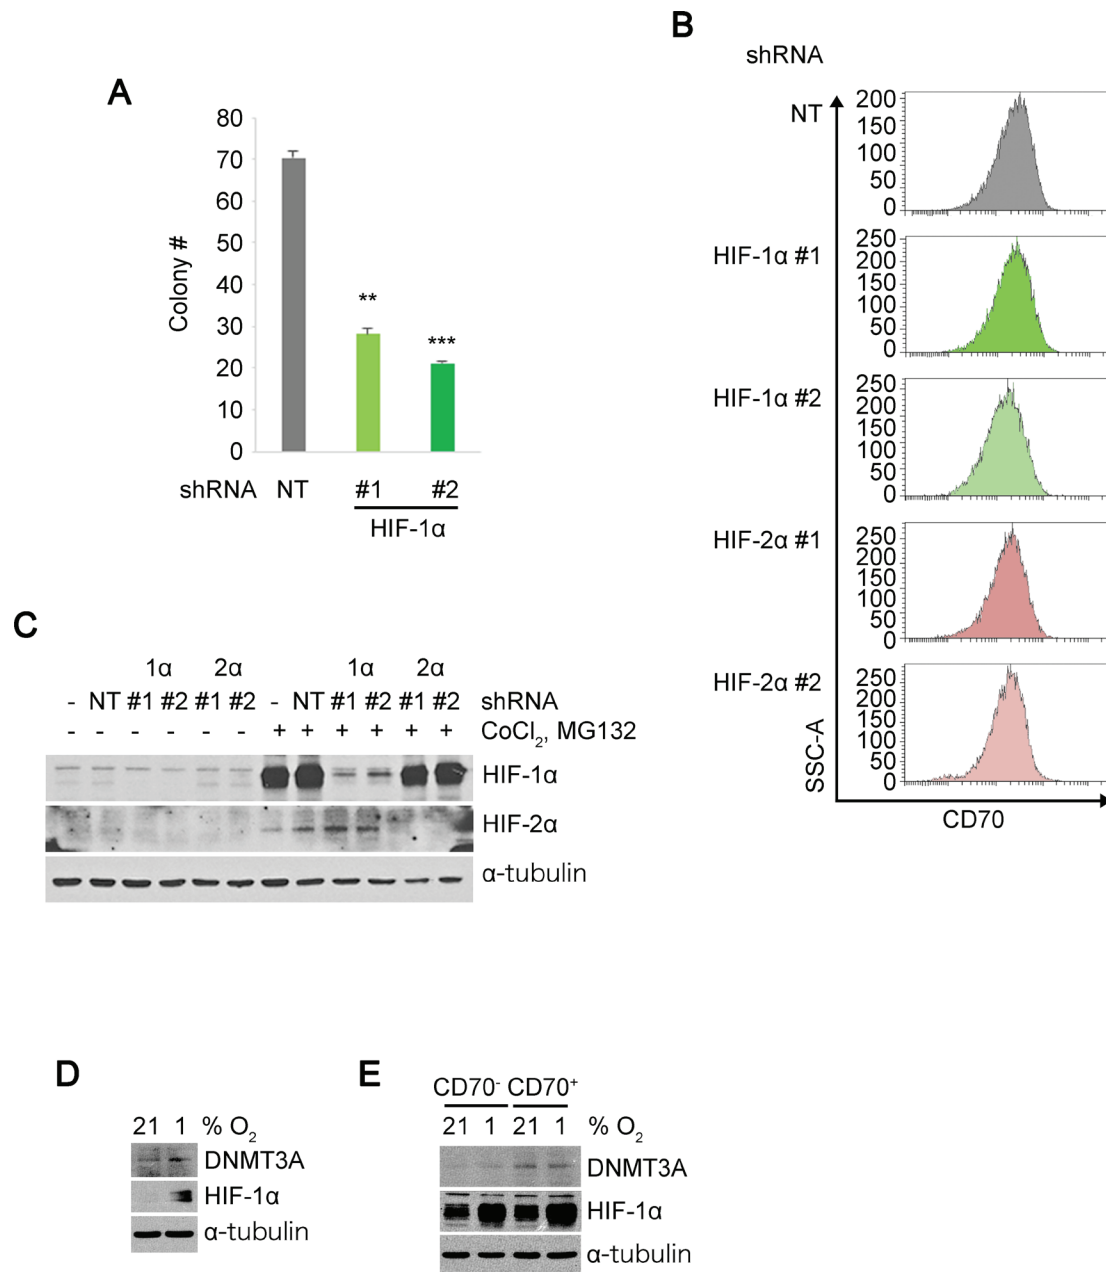

**Supplementary Figure 2:** (A) Colony numbers in soft agar of two independent HIF-1 $\alpha$  knockdown together with non-targeting (NT) control. (B) CD70 protein expressions in CD70<sup>+</sup> PEO1 cells with NT control, HIF-1 $\alpha$  or HIF-2 $\alpha$  shRNA knockdown cultured under hypoxic conditions for 2 days were analyzed by using flow cytometry. (C) Immunoblots showing HIF-1 $\alpha$  and HIF-2 $\alpha$  levels in CD70<sup>+</sup> PEO1 cells infected with each two independent HIF-1 $\alpha$  (1 $\alpha$ ) or HIF-2 $\alpha$  (2 $\alpha$ ) shRNAs compared to NT control. Cells with the indicated shRNAs were treated in the presence (+) or absence (-) of CoCl<sub>2</sub> and MG132.  $\alpha$ -tubulin expressions was used as a protein loading control. (D, E) DNMT3A expression under hypoxia in OVTOKO (D) or H1975 (E) cells was examined by immunoblot. HIF-1 $\alpha$  or  $\alpha$ -tubulin (those in panel E and Figure 4A are identical) were used for hypoxia or loading controls, respectively.

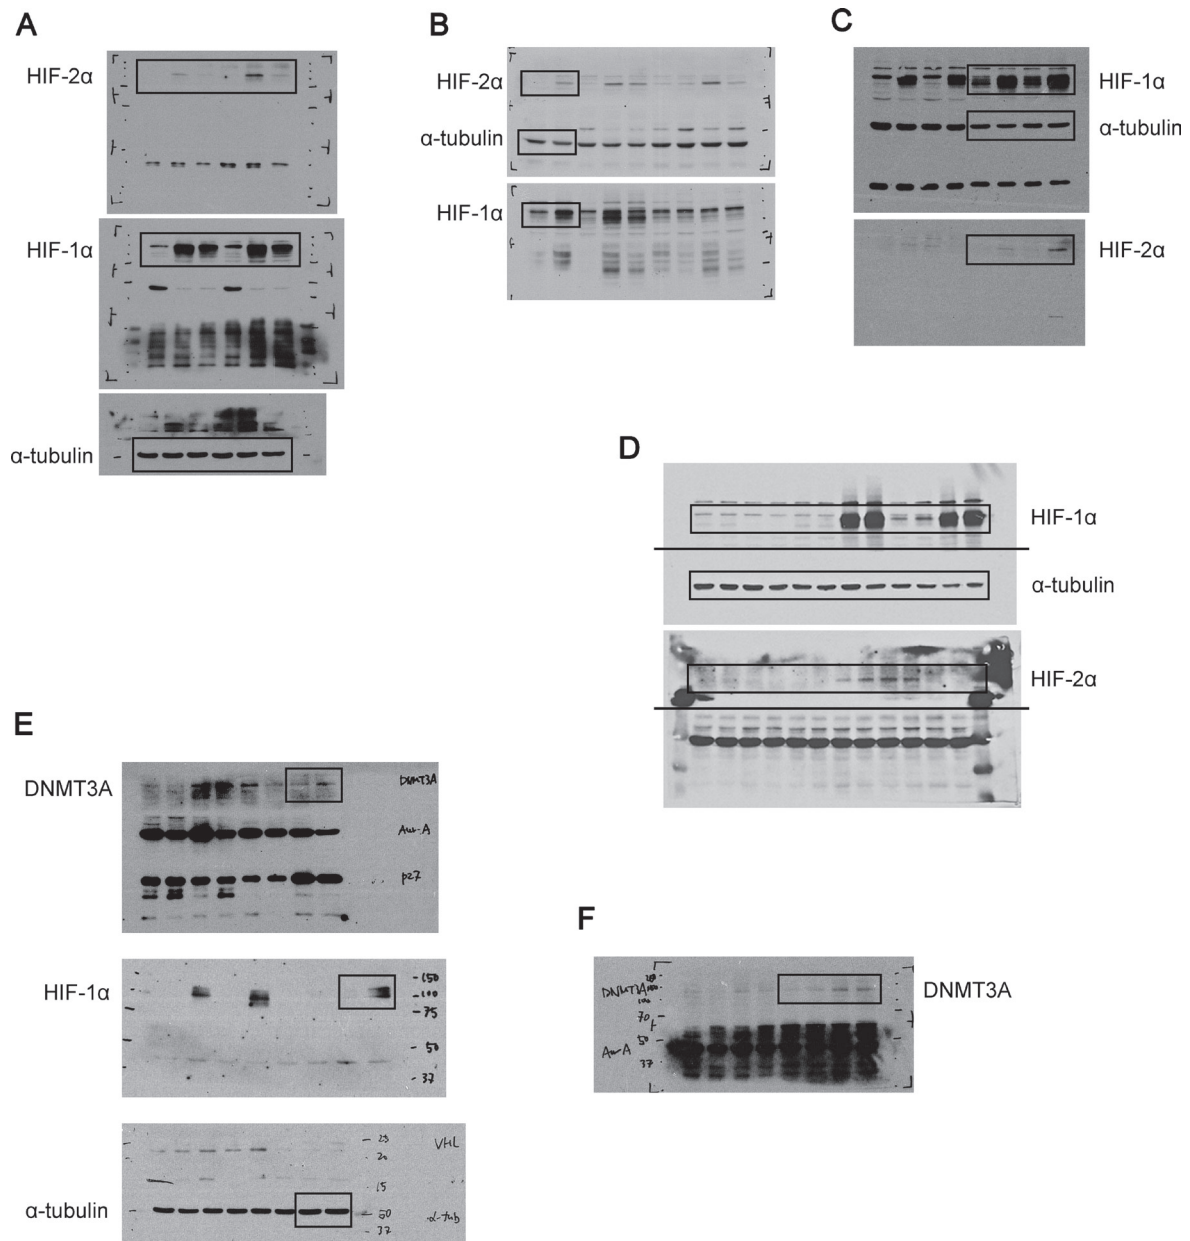

**Supplementary Figure 3: Uncropped images of immunoblots.** (A–C) HIF-2α, HIF-1α and α-tubulin protein expression levels are indicated in CaOV-2 (A), PEO1 (B) or H1975 (C) cells as represented in Figure 4A. (D) HIF-1α, α-tubulin and HIF-2α expressions for Supplementary Figure 2C. (E) DNMT3A, HIF-1α and α-tubulin immunoblots are shown as for Supplementary Figure 2D. (F) DNMT3A protein expression as indicated in Supplementary Figure 2E. The blots showing HIF-1α and α-tubulin expression levels in H1975 for Supplementary Figure 2E were identical to those shown in Figure 4A.

**Supplementary Table 1: The target sequences for qRT-PCR, bisulfite sequencing and RNAi**

| <b>Primer sequences</b> |               |         |                                    |
|-------------------------|---------------|---------|------------------------------------|
| <b>Target</b>           | <b>Symbol</b> |         | <b>Sequence</b>                    |
| CD70                    | <i>CD70</i>   | Foward  | TCTCAGCTTCCACCAAGGTT               |
| CD70                    | <i>CD70</i>   | Reverse | AAGTGTCCCAGTGAGGTTGG               |
| B2M                     | <i>B2M</i>    | Foward  | TGCTCGCGCTACTCTCTCTTT              |
| B2M                     | <i>B2M</i>    | Reverse | TGTCGGATGGATGAAACCCAGA             |
| CD70*                   | <i>CD70</i>   | Foward  | TTAAAGAGGAAGTAGGTTTGAATTAG         |
| CD70*                   | <i>CD70</i>   | Reverse | TCAAAAACACTACTAAAAACTTCACAAAACATAA |

\*for bisulfite sequencing.

| <b>shRNA target sequences</b> |               |    |                                                            |               |
|-------------------------------|---------------|----|------------------------------------------------------------|---------------|
| <b>Target</b>                 | <b>Symbol</b> |    | <b>Sequence</b>                                            | <b>Region</b> |
| CD70                          | <i>CD70</i>   | #1 | CCGGGAAACACTGATGAGACCTTCTCTCGAGAGAAGGTCTCATCAGTGTTTCTTTTT  | CDS           |
| HIF-1 $\alpha$                | <i>HIF1A</i>  | #1 | CCGGCGGCGAAGTAAAGAATCTGAACTCGAGTTCAGATTCTTTACTTCGCCGTTTTT  | CDS           |
| HIF-1 $\alpha$                | <i>HIF1A</i>  | #2 | CCGGTGCTCTTTGTGGTTGGATCTACTCGAGTAGATCCAACCACAAAGAGCATTTTT  | 3' UTR        |
| HIF-2 $\alpha$                | <i>EPAS1</i>  | #1 | CCGGCAGTACCCAGACGGATTTCAACTCGAGTTGAAATCCGTCTGGGTACTGTTTTT  | CDS           |
| HIF-2 $\alpha$                | <i>EPAS1</i>  | #2 | CCGGCCATGAGGAGATTCTGTGAGAACTCGAGTTCTCACGAATCTCCTCATGGTTTTT | CDS           |
